# Supplementary material
Source: publisher site journal article supplement (https://www.dovepress.com/article/221598)
Supplement: Supplementary file 1 [file get_supplementary_file.php]

## Supporting information

# **Fabricating $\beta$ -cyclodextrin based pH-responsive nanotheranostics as a programmable polymeric nanocapsule for simultaneous diagnosis and therapy**

Atefeh Zarepour<sup>1</sup>

Ali Zarrabi<sup>1</sup>

Kim Lambertsen Larsen<sup>2</sup>

<sup>1</sup> Department of Biotechnology, Faculty of Advanced Sciences and Technologies, University of Isfahan, Isfahan, Iran; <sup>2</sup> Department of Chemistry and Bioscience, Faculty of Chemistry, Aalborg University, Aalborg, Denmark.

Correspondence: Dr. Ali Zarrabi

Department of Biotechnology, Faculty of Advanced Sciences and Technologies, University of Isfahan, 81746-73441, Isfahan, Iran

Tel 0098 31 37934360

Fax 0098 31 37932342

Email a.zarrabi@ast.ui.ac.ir

## Fabrication of Fe<sub>3</sub>O<sub>4</sub> and Fe<sub>2</sub>O<sub>3</sub> nanoparticles

Fe<sub>3</sub>O<sub>4</sub> nanoparticles were synthesized by co-precipitation method and then were converted to the  $\gamma$ -Fe<sub>2</sub>O<sub>3</sub> nanoparticles by the aim of diluted HNO<sub>3</sub>. FE-SEM result of the Fe<sub>3</sub>O<sub>4</sub> nanoparticles revealed that these nanoparticles had spherical shape with 15.5±0.4 nm size (Figure S1).

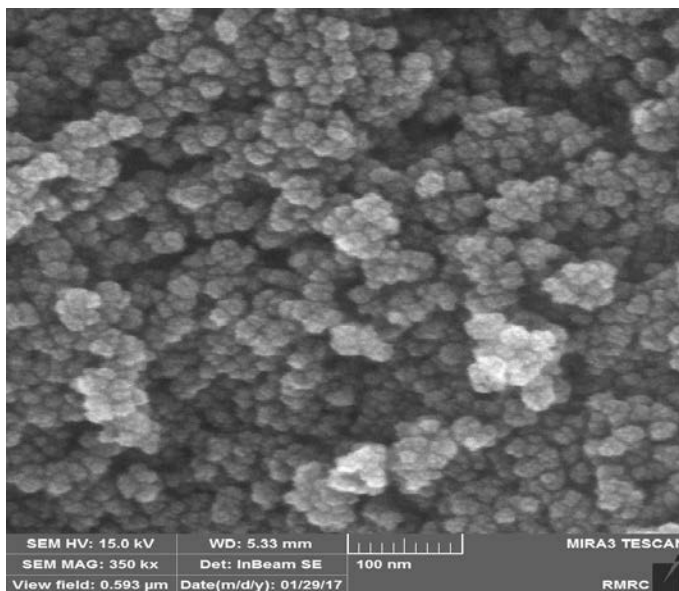

Figure S1. FE-SEM image of Fe<sub>3</sub>O<sub>4</sub> nanoparticles.

Difference between FTIR spectrums of two nanoparticles were shown in Figure S2. Appearance of RNO<sub>2</sub> peak at around 1380 cm<sup>-1</sup> and also two Fe-O peaks at 550-700 cm<sup>-1</sup> in the curve of  $\gamma$ -Fe<sub>2</sub>O<sub>3</sub> nanoparticles were two main differences that revealed the production of  $\gamma$ -Fe<sub>2</sub>O<sub>3</sub>.

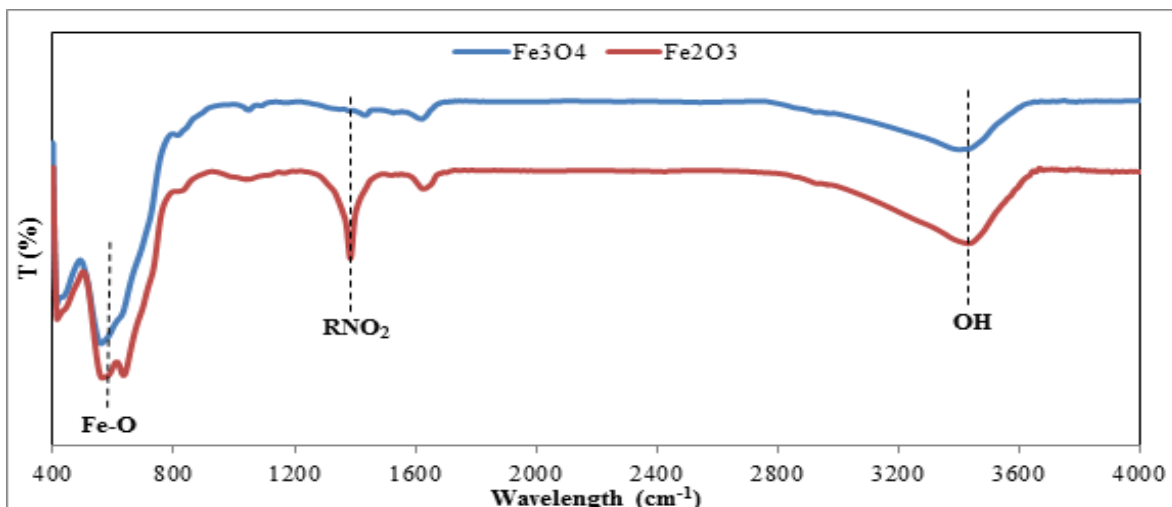

Figure S2. FTIR spectrum of  $\text{Fe}_3\text{O}_4$  and  $\gamma\text{-Fe}_2\text{O}_3$  nanoparticles.

In Figure S3, the XRD results of  $\text{Fe}_3\text{O}_4$  and  $\text{Fe}_2\text{O}_3$  nanoparticles were shown. In fact, there were no significant differences between the spectrum of  $\text{Fe}_3\text{O}_4$  and  $\text{Fe}_2\text{O}_3$  nanoparticles except two peaks at around  $28^\circ$  and  $31^\circ$  in the  $\text{Fe}_2\text{O}_3$  spectrum which were indexed as (210) and (211), respectively (according to the JCPDS Card No. 019-0629 and JCPDS Card No. 39-1346 respectively) [1].

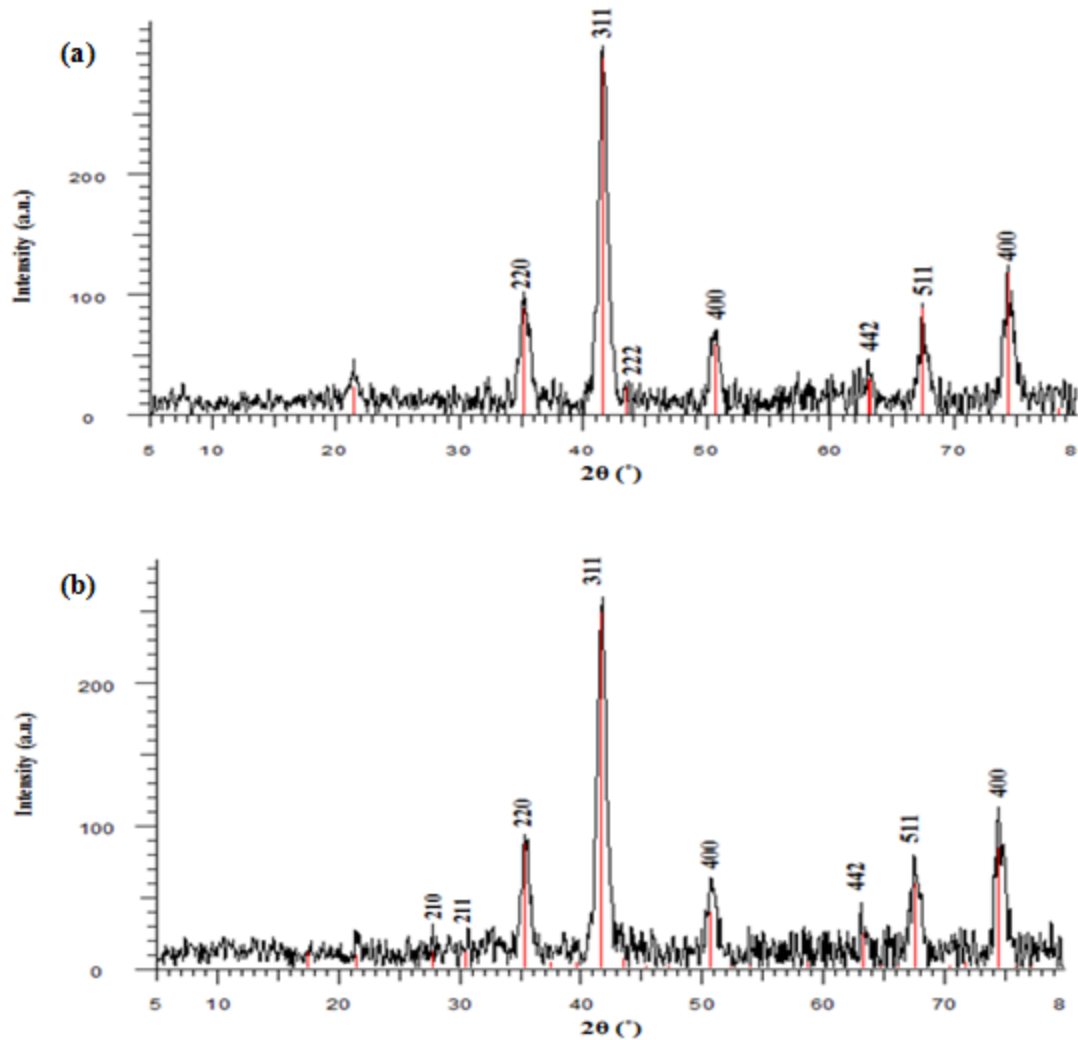

Figure S3. XRD results of a)  $\text{Fe}_3\text{O}_4$  and b)  $\gamma\text{-Fe}_2\text{O}_3$  nanoparticles.

## Preparation of thiolated $\beta\text{CD}$

In order to prepare the first layer of the nanocapsule, it was necessary to thiolate the cyclodextrin monomers. This was done in a two-step process: tosylation of  $\beta\text{CD}$ , and exchanging the tosyl group with thiol group. Occurrence of tosylation process was confirmed by FTIR analysis. As it is clear in Figure S4, the emergence of the  $\text{SO}_2$  peak in the spectrum of Tos- $\beta\text{CD}$  in comparison with the  $\beta\text{CD}$  could be considered as an evidence that confirm this reaction.

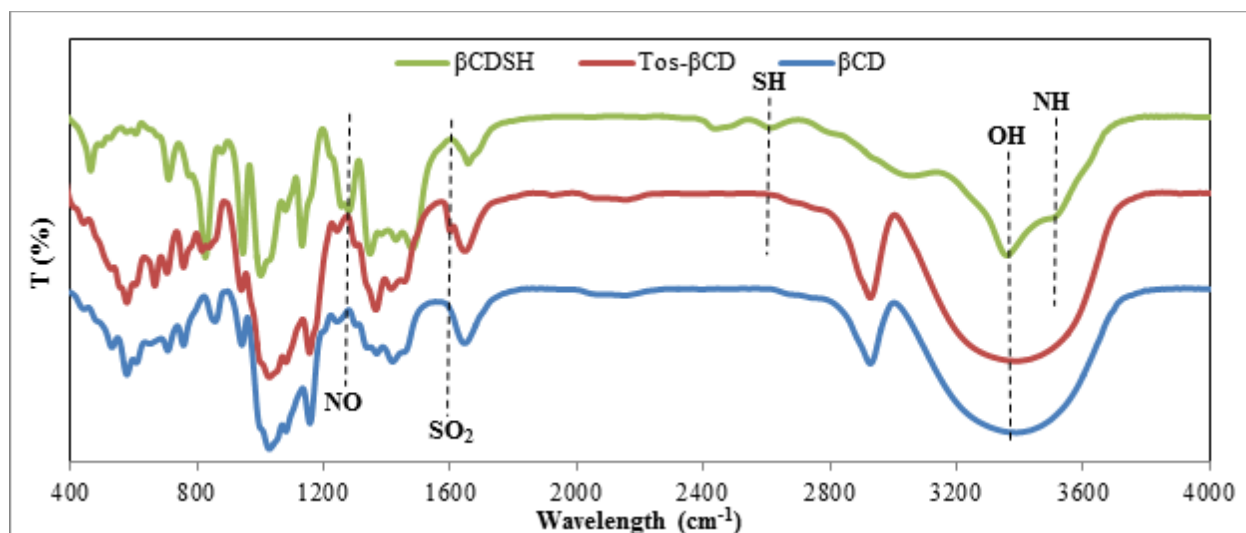

Figure S4. FTIR results of  $\beta$ CD, Tos- $\beta$ CD and  $\beta$ CDSH.

The thiolation reaction was performed by the aim of cystamine dehydrochloride, in which the amine group of cystamine was attached to the  $\beta$ CD by removing the tosyl group. The appearance of NH, SH, and NO peaks at around 3400, 2600 and 1230  $\text{cm}^{-1}$  as well as disappearance of tosyl peak in the spectrum of  $\beta$ CDSH were the most important findings that confirmed the correct formation of  $\beta$ CDSH.

## Synthesis of PAA-SDN

After preparation of PAA-SDN polymeric layer, it was characterized with FTIR and  $^1\text{H-NMR}$  (in DMSO). The appearance of amid bond in FTIR ( $1690 \text{ cm}^{-1}$ ) and NMR (7.9 ppm) along with the elimination of the carboxylic acid peak (12ppm) of PAA in  $^1\text{H-NMR}$  spectrum of PAA-SDN, revealed the formation of this layer (Figure S5).

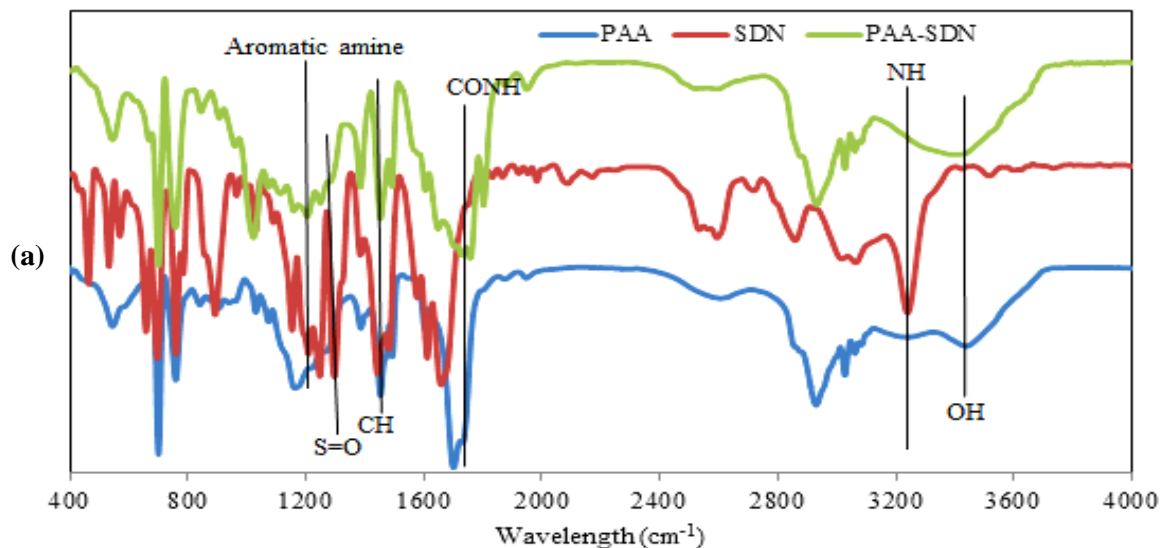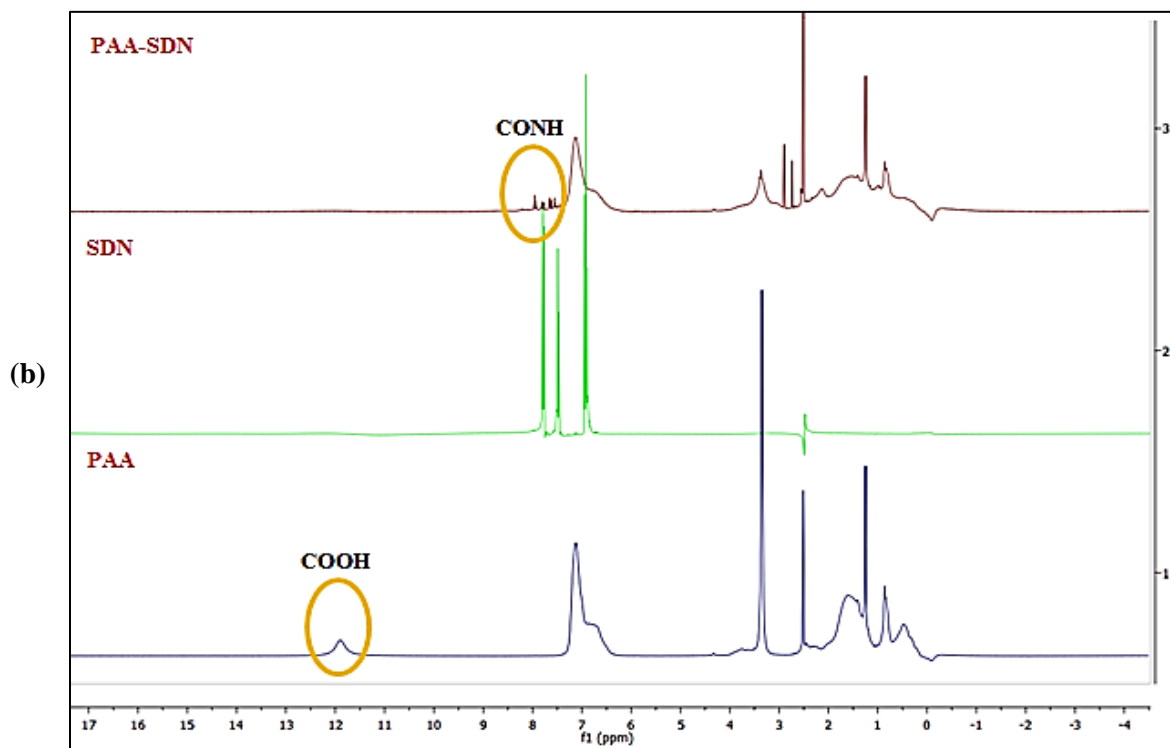

Figure S5. a) FTIR and b) <sup>1</sup>H-NMR results of PAA, SDN and PAA-SDN.

## Preparation of PEI-βCD

In the third polymeric layer of this nanocapsule, molecules of βCD were attached to the linear PEI with molecular weight of 2500 Dalton. For this reaction, cyclodextrins were derivitized by the attachment of tosyl group acting as a suitable leaving group while

facilitating the attachment of  $\beta$ CD to PEI. In Figure S6 (a, b) the FTIR and  $^1\text{H-NMR}$  (in  $\text{D}_2\text{O}$ ) results of the third layer are shown. Based on the results of FTIR, appearance of amid bond at around  $1690\text{ cm}^{-1}$  in the spectrum of PEI- $\beta$ CD with the absence of NH and  $\text{SO}_2$  peaks, revealed the preparation of the third polymer layer. This was further approved by the results of  $^1\text{H-NMR}$  (the characteristic peak at around 3.3 ppm). Based on the results of  $^1\text{H-NMR}$  the mole ratio of  $\beta$ CD attached to nitrogen groups of the polymer was calculated at about 1:2.

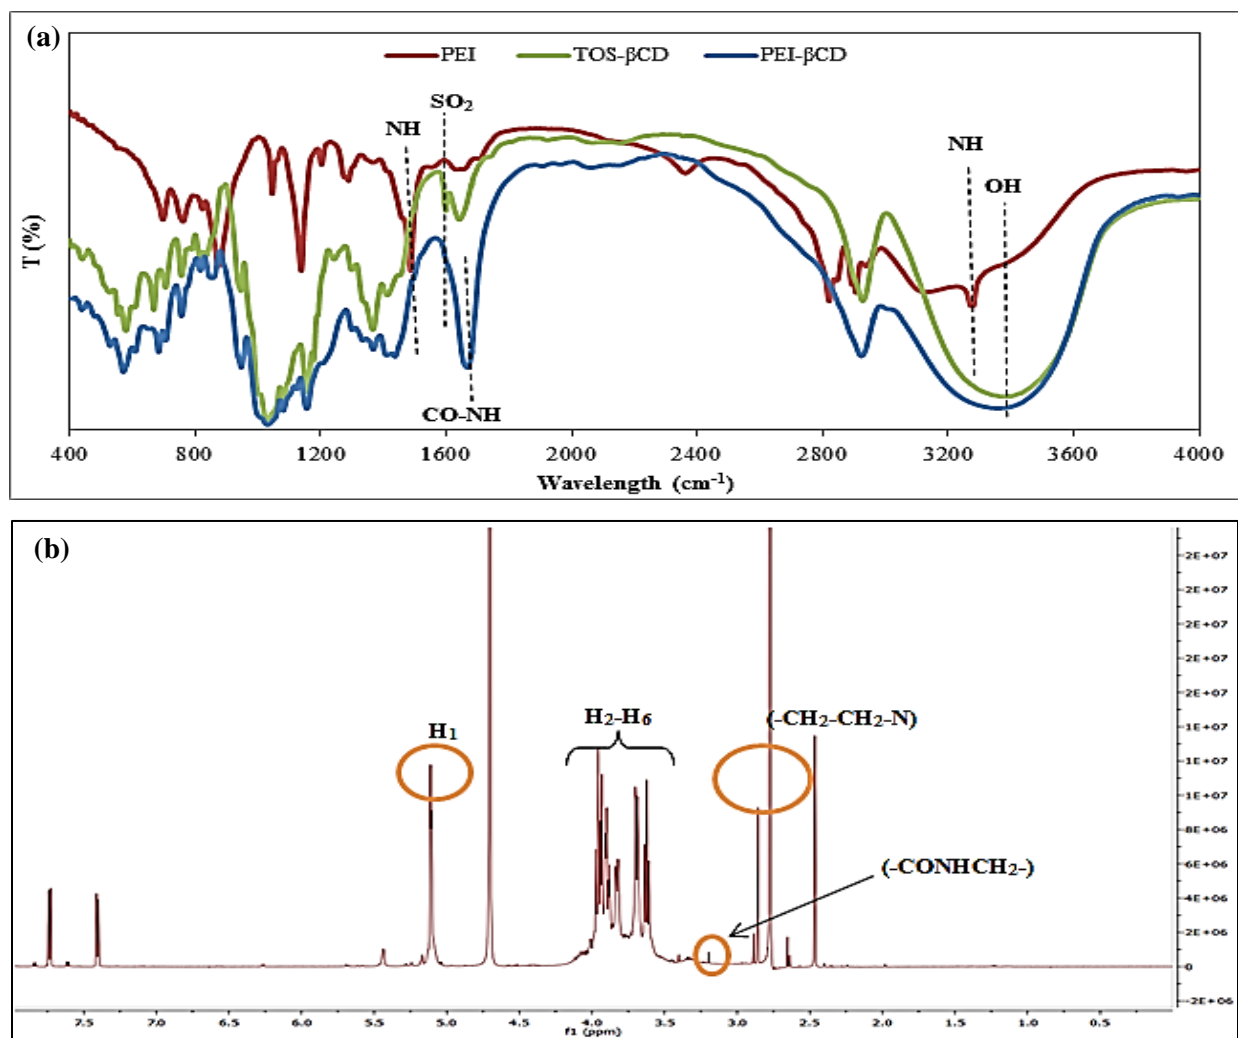

Figure S6. A) FTIR PEI,  $\beta$ CD, PEI- $\beta$ CD and b)  $^1\text{H-NMR}$  results of PEI- $\beta$ CD.

## References

- [1] W. Kim, C.-Y. Suh, S.-W. Cho, K.-M. Roh, H. Kwon, K. Song, I.-J. Shon, A new method for the identification and quantification of magnetite–maghemite mixture using conventional X-ray diffraction technique, *Talanta*, 94 (2012) 348-352.
